# Supplementary material
Source: publisher figshare collection journal article supplement (https://tandf.figshare.com/ndownloader/files/12974576)
Supplement: Supplementary file 1 [file 12974576]

**Supplementary**

Table 1 The rate of antihypertensive medicine among hypertensive patients at each visit. Values are rates (number of antihypertensive/ total).

|  | Baseline | Month 3 | Month 6 | Month 12 |
| --- | --- | --- | --- | --- |
| Regular salt group | 77.3% (85/110) | 69.7% (76/109) | 72.9% (78/107) | 68.6% (72/105) |
| Salt substitute group | 71.8% (79/110) | 56.9% (62/109) | 62.6% (67/107) | 58.8% (60/102) |
| X2, P | 0.862, 0.353 | 3.87, 0.049 | 2.588, 0.108 | 2.128, 0.145 |

Table 2. The weight among hypertensive patients at each visit. Values are means ± SD.

|  | Baseline | Month 3 |  | Month 6 |  | Month 12 |  |
| --- | --- | --- | --- | --- | --- | --- | --- |
|  |  | Weight | Weight changes | Weight | Weight changes | Weight | Weight changes |
| Regular salt group | 73.6±11.3 | 72.5±12.8 | 1.02±10.3 | 74.1±13.6 | 0.9±9.9 | 74.1±13.6 | 0.5±9.3 |
| Salt substitute group | 71.4±10.6 | 70.1±10.7 | 0.8±2.4 | 72.3±10.9 | 1.1±2.6 | 72.6±11.2 | 0.7±2.9 |
|  |  |  |  |  |  |  |  |
| t, P | 1.558, 0.121 | 1.424, 0.156 | 0.163, 0.871 | 1.019, 0.31 | 0.195, 0.846 | 0.849, 0.397 | 0.182, 0.856 |
